# Supplementary material for: Within and between population variation in inbreeding depression in the locally threatened perennial Scabiosa columbaria
Source: Springer Nature journal article supplement (doi:10.1007/s10592-013-0541-4), 2013-10-25
Supplement: MOESM1 [file 10592_2013_541_MOESM1_ESM.docx]

Table S1 – Name, size and coordinates of the five natural population of *S. columbaria* included in the study

| **Population name** | **Estimated size** | **Coordinates** |
| --- | --- | --- |
| Kannerhei (KH) | 293 | 50º 49'03'' N, 5º 40'42'' E |
| Karrestraat (KA) | 975 | 50º 51'47'' N, 5º 54'45'' E |
| Bemelerberg (BE) | 1,178 | 50º 51'03'' N, 5º 46'08'' E |
| Wolfskop (WK) | 1,635 | 50º 49'13'' N, 5º 46'38'' E |
| Wrakelberg (WB) | 122,000 | 50º 50'52'' N, 5º 54'34'' E |

Table S2. Pearsons’ coefficients of correlation between the values of the various phenotypic traits (diaspore weight, germination, seedling size, juvenile size, relative growth rate, incidence of flowering, bolting time and multiplicative fitness) for all five different population together. Significant correlations after FDR correction are shown in bold.

| **ALL** | **D. weight** | **Germ.** | **S. size** | **JS1** | **RGR** | **Inc. flow.** | **Fl. onset** | **M. fitness** |
| --- | --- | --- | --- | --- | --- | --- | --- | --- |
| **D. weight** | **—** |  |  |  |  |  |  |  |
| **Germ.** | -0.09 | **—** |  |  |  |  |  |  |
| **S. size** | **0.48** | **0.14** | **—** |  |  |  |  |  |
| **JS1** | 0.13 | -0.01 | 0.13 | **—** |  |  |  |  |
| **RGR** | -0.07 | 0.01 | 0.09 | **-0.22** | **—** |  |  |  |
| **Inc. flow.** | 0.13 | **0.18** | 0.08 | 0.08 | -0.12 | **—** |  |  |
| **Bolt. time** | **0.17** | -0.05 | -0.04 | -0.04 | -0.08 | **-0.43** | **—** |  |
| **M. fitness** | 0.12 | **0.45** | **0.22** | **0.51** | -0.13 | **0.53** | **-0.32** | **—** |

Table S3. Pearsons’ correlation coefficients among values of different phenotypic traits (diaspore weight, germination, seedling size, juvenile size, relative growth rate, incidence of flowering, bolting time and multiplicative fitness). The analysis was repeated for each population individually. Significant correlations after FDR correction are shown in bold.

| **Population** | **D.weight** | **Germ.** | **S. size** | **JS1** | **RGR** | **Inc. flow.** | **Fl. onset** | **M. fitness** |
| --- | --- | --- | --- | --- | --- | --- | --- | --- |
| **KH** |  |  |  |  |  |  |  |  |
| **D. weight** | **—** |  |  |  |  |  |  |  |
| **Germ.** | **-0.34** | **—** |  |  |  |  |  |  |
| **S. size** | **0.44** | 0.06 | **—** |  |  |  |  |  |
| **JS1** | -0.04 | -0.10 | -0.11 | **—** |  |  |  |  |
| **RGR** | -0.23 | 0.01 | -0.24 | **-0.40** | **—** |  |  |  |
| **Inc. flow.** | **0.48** | -0.30 | 0.24 | 0.08 | -0.23 | **—** |  |  |
| **Bolt. time** | -0.01 | -0.01 | -0.05 | 0.03 | -0.27 | **-0.45** | **—** |  |
| **M. fitness** | 0.16 | 0.24 | 0.12 | **0.52** | -0.21 | **0.61** | -0.26 | **—** |
| **KA** |  |  |  |  |  |  |  |  |
| **D. weight** | **—** |  |  |  |  |  |  |  |
| **Germ.** | -0.02 | **—** |  |  |  |  |  |  |
| **S. size** | **0.60** | 0.07 | **—** |  |  |  |  |  |
| **JS1** | -0.06 | 0.10 | 0.12 | **—** |  |  |  |  |
| **RGR** | 0.04 | -0.01 | -0.15 | **-0.43** | **—** |  |  |  |
| **Inc. flow.** | -0.05 | **-0.32** | 0.04 | -0.29 | **0.17** | **—** |  |  |
| **Bolt. time** | **0.37** | 0.13 | 0.06 | -0.25 | 0.01 | **-0.31** | **—** |  |
| **M. fitness** | -0.05 | **0.58** | 0.04 | 0.24 | -0.15 | 0.26 | -0.21 | **—** |
| **BE** |  |  |  |  |  |  |  |  |
| **D. weight** | **—** |  |  |  |  |  |  |  |
| **Germ.** | -0.14 | **—** |  |  |  |  |  |  |
| **S. size** | **0.48** | -0.27 | **—** |  |  |  |  |  |
| **JS1** | 0.11 | -0.05 | **0.40** | **—** |  |  |  |  |
| **RGR** | **0.33** | -0.08 | -0.13 | -0.26 | **—** |  |  |  |
| **Inc. flow.** | **0.47** | -0.04 | **0.46** | **0.33** | 0.07 | **—** |  |  |
| **Bolt. time** | -0.28 | 0.15 | -0.23 | -0.16 | -0.16 | **-0.50** | **—** |  |
| **M. fitness** | 0.15 | **0.43** | 0.24 | **0.72** | -0.20 | **0.63** | -0.26 | **—** |
| **WK** |  |  |  |  |  |  |  |  |
| **D. weight** | **—** |  |  |  |  |  |  |  |
| **Germ.** | 0.14 | **—** |  |  |  |  |  |  |
| **S. size** | **0.56** | 0.09 | **—** |  |  |  |  |  |
| **JS1** | 0.30 | 0.01 | 0.24 | **—** |  |  |  |  |
| **RGR** | **-0.45** | 0.05 | -0.14 | **-0.53** | **—** |  |  |  |
| **Inc. flow.** | 0.19 | -0.14 | 0.23 | -0.04 | -0.16 | **—** |  |  |
| **Bolt. time** | 0.03 | -0.04 | -0.19 | 0.11 | -0.21 | **-0.36** | **—** |  |
| **M. fitness** | **0.46** | 0.24 | **0.42** | **0.39** | -0.29 | **0.79** | -0.27 | **—** |
| **WB** |  |  |  |  |  |  |  |  |
| **D. weight** | **—** |  |  |  |  |  |  |  |
| **Germ.** | 0.20 | **—** |  |  |  |  |  |  |
| **S. size** | **0.53** | **0.37** | **—** |  |  |  |  |  |
| **JS1** | -0.07 | 0.27 | 0.18 | **—** |  |  |  |  |
| **RGR** | 0.01 | 0.10 | -0.25 | -0.24 | **—** |  |  |  |
| **Inc. flow.** | -0.24 | 0.06 | -0.25 | 0.20 | -0.29 | **—** |  |  |
| **Bolt. time** | **0.38** | -0.26 | 0.01 | -0.20 | 0.28 | **-0.51** | **—** |  |
| **M. fitness** | -0.01 | **0.80** | 0.28 | **0.57** | -0.28 | **0.50** | **-0.53** | **—** |

Table S4.Pearsons’ coefficients of correlation between inbreeding depression coefficients of the various phenotypic traits (diaspore weight, germination, seedling size, juvenile size, relative growth rate, incidence of flowering, bolting time and multiplicative fitness) for all five different population together. Significant correlations after FDR correction are shown in bold.

| **ALL** | **D. weight** | **Germ.** | **S. size** | **JS1** | **RGR** | **Inc. flow.** | **Fl. onset** | **M. fitness** |
| --- | --- | --- | --- | --- | --- | --- | --- | --- |
| **D. weight** | **—** |  |  |  |  |  |  |  |
| **Germ.** | **0.26** | **—** |  |  |  |  |  |  |
| **S. size** | **0.31** | 0.13 | **—** |  |  |  |  |  |
| **JS1** | -0.08 | -0.12 | 0.08 | **—** |  |  |  |  |
| **RGR** | -0.24 | -0.12 | 0.20 | **-0.41** | **—** |  |  |  |
| **Inc. flow.** | -0.33  3 | 0.00 | 0.07 | 0.07 | -0.02 | **—** |  |  |
| **Bolt. time** | **0.29** | 0.14 | -0.15 | **-0.23** | -0.04 | -0.17 | **—** |  |
| **M. fitness** | 0.42 | **0.49** | 0.11 | **0.40** | **-0.23** | **0.43** | **0.32** | **—** |

Table S5. Pearsons’ correlation coefficients among inbreeding depression coefficients across different phenotypic traits (diaspore weight, germination, seedling size, juvenile size, relative growth rate, incidence of flowering, bolting time and multiplicative fitness). The analysis was repeated for each population individually. Significant correlations after FDR correction are shown in bold.

| **Population** | **D.weight** | **Germ.** | **S. size** | **JS1** | **RGR** | **Inc. flow.** | **Fl. onset** | **M. fitness** |
| --- | --- | --- | --- | --- | --- | --- | --- | --- |
| **KH** |  |  |  |  |  |  |  |  |
| **d. weight** | **—** |  |  |  |  |  |  |  |
| **Germ.** | -0.10 | **—** |  |  |  |  |  |  |
| **S. size** | 0.22 | 0.04 | **—** |  |  |  |  |  |
| **JS1** | -0.25 | -0.30 | 0.17 | **—** |  |  |  |  |
| **RGR** | -**0.49** | 0.39 | -0.27 | -**0.55** | **—** |  |  |  |
| **Inc. flow.** | -0.04 | -0.05 | 0.18 | 0.14 | -0.11 | **—** |  |  |
| **Bolt. time** | -0.12 | 0.24 | -0.34 | -0.32 | 0.29 | -0.07 | **—** |  |
| **M. fitness** | -0.50 | 0.21 | 0.32 | **0.66** | -0.14 | 0.44 | -0.35 | **—** |
| **KA** |  |  |  |  |  |  |  |  |
| **D. weight** | **—** |  |  |  |  |  |  |  |
| **Germ.** | 0.35 | **—** |  |  |  |  |  |  |
| **S. size** | 0.42 | 0.37 | **—** |  |  |  |  |  |
| **JS1** | -0.27 | -0.07 | -0.29 | **—** |  |  |  |  |
| **RGR** | 0.17 | -0.19 | 0.12 | **-0.54** | **—** |  |  |  |
| **Inc. flow.** | 0.10 | -0.16 | -0.29 | -0.10 | **0.49** | **—** |  |  |
| **Bolt. time** | 0.41 | **0.57** | 0.12 | -0.30 | 0.01 | -0.05 | **—** |  |
| **M. fitness** | -0.17 | **0.59** | -0.19 | -0.07 | -0.02 | 0.00 | -0.23 | **—** |
| **BE** |  |  |  |  |  |  |  |  |
| **D. weight** | **—** |  |  |  |  |  |  |  |
| **Germ.** | 0.15 | **—** |  |  |  |  |  |  |
| **S. size** | **0.56** | 0.12 | **—** |  |  |  |  |  |
| **JS1** | 0.14 | 0.13 | 0.30 | **—** |  |  |  |  |
| **RGR** | -0.06 | -0.30 | -0.11 | -**0.46** | **—** |  |  |  |
| **Inc. flow.** | -0.16 | 0.12 | 0.32 | 0.13 | -0.20 | **—** |  |  |
| **Bolt. time** | -0.43 | -0.10 | 0.09 | -0.32 | 0.02 | -0.15 | **—** |  |
| **M. fitness** | 0.16 | 0.43 | 0.24 | **0.74** | -0.40 | 0.40 | 0.35 | **—** |
| **WK** |  |  |  |  |  |  |  |  |
| **D. weight** | **—** |  |  |  |  |  |  |  |
| **Germ.** | 0.27 | **—** |  |  |  |  |  |  |
| **S. size** | 0.12 | 0.30 | **—** |  |  |  |  |  |
| **JS1** | -0.05 | 0.17 | -0.25 | **—** |  |  |  |  |
| **RGR** | -0.11 | -0.06 | 0.36 | -0.40 | **—** |  |  |  |
| **Inc. flow.** | -0.09 | 0.30 | -0.09 | 0.31 | 0.02 | **—** |  |  |
| **Bolt. time** | -0.30 | 0.41 | 0.38 | -0.20 | -0.02 | -0.49 | **—** |  |
| **M. fitness** | -0.07 | **0.63** | 0.02 | **0.57** | -0.13 | **0.78** | **-0.65** | **—** |
| **WB** |  |  |  |  |  |  |  |  |
| **D. weight** | **—** |  |  |  |  |  |  |  |
| **Germ.** | 0.35 | **—** |  |  |  |  |  |  |
| **S. size** | 0.31 | -0.21 | **—** |  |  |  |  |  |
| **JS1** | 0.15 | -0.30 | -0.03 | **—** |  |  |  |  |
| **RGR** | -0.07 | -0.11 | 0.27 | 0.14 | **—** |  |  |  |
| **Inc. flow.** | 0.11 | 0.02 | -0.01 | -0.18 | -0.26 | **—** |  |  |
| **Bolt. time** | -0.18 | -0.43 | 0.30 | 0.04 | 0.02 | **0.56** | **—** |  |
| **M. fitness** | 0.16 | **0.58** | -0.43 | 0.14 | -0.42 | **0.67** | 0.11 | **—** |
